# Supplementary material for: The IUPHAR/BPS Guide to PHARMACOLOGY in 2016: towards curated quantitative interactions between 1300 protein targets and 6000 ligands
Source: Oxford University Press journal article supplement (doi:10.1093/nar/gkv1037), 2015-10-12
Supplement: gkv1037_Supplementary_Data.zip [file gkv1037_Supplementary_Data.zip]

Archive with 1 entries (1 files):
- nar-02635-data-e-2015-File010.pdf
