# Supplementary material for: The IUPHAR/BPS Guide to PHARMACOLOGY in 2016: towards curated quantitative interactions between 1300 protein targets and 6000 ligands
Source: Oxford University Press journal article supplement (doi:10.1093/nar/gkv1037), 2015-10-12
Supplement: gkv1037_Supplementary_Data.zip [file gkv1037_Supplementary_Data.zip › nar-02635-data-e-2015-File010.pdf]

imatinib

Ligand Id: 5687

Ligand name

imatinib

2D Structure

Cc1ccc(NC(=O)c2ccc(cc2)CN3CCNCC3)n4nc5ccccc5n4

Calculated Physico-chemical Properties

|                                |        |
|--------------------------------|--------|
| Hydrogen bond acceptors        | 8      |
| Hydrogen bond donors           | 2      |
| Rotatable bonds                | 8      |
| Topological polar surface area | 86.28  |
| Molecular weight               | 493.26 |
| XLogP                          | 4.27   |
| No. Lipinski's rules broken    | 0      |

Molecular properties generated using the CDK

SummaryBiological activityScreensClinical dataReferencesStructureSimilar ligands

Large-scale screening data

DiscoverRx kinome-wide affinity profile

Click on the image for a full-size view of the kinome-wide affinity profile for this compound.

Image was generated with the DiscoverRx TREEspot™ Compound Profile Visualization Software v4.0 using quantitative affinity data that were derived from the DiscoverRx KINOMEScan® platform.

To use the interactive DiscoverRx TREEspot™ Compound Profile Visualization Software, [click here](#).

DiscoverRx KINOMEScan® screen

A screen of 72 inhibitors against 456 human kinases. Quantitative data were derived using DiscoverRx KINOMEScan® platform.  
<http://www.discoverx.com/services/drug-discovery-development-services/kinase-profiling/kinomescan>  
Reference: 2,5

Key to terms and symbols

Click column headers to sort

| Target                                                        | Name in screen                | Sp. | Type      | Action     | Affinity | Units                  |
|---------------------------------------------------------------|-------------------------------|-----|-----------|------------|----------|------------------------|
| discoidin domain receptor tyrosine kinase 1                   | DDR1                          | Hs  | Inhibitor | Inhibition | 9.1      | p <i>K<sub>d</sub></i> |
| ABL proto-oncogene 1, non-receptor tyrosine kinase            | ABL1-nonphosphorylated        | Hs  | Inhibitor | Inhibition | 9.0      | p <i>K<sub>d</sub></i> |
| ABL proto-oncogene 1, non-receptor tyrosine kinase            | ABL1(Q252H)-nonphosphorylated | Hs  | Inhibitor | Inhibition | 8.7      | p <i>K<sub>d</sub></i> |
| ABL proto-oncogene 1, non-receptor tyrosine kinase            | ABL1(F317L)-nonphosphorylated | Hs  | Inhibitor | Inhibition | 8.6      | p <i>K<sub>d</sub></i> |
| ABL proto-oncogene 1, non-receptor tyrosine kinase            | ABL1(H396P)-nonphosphorylated | Hs  | Inhibitor | Inhibition | 8.2      | p <i>K<sub>d</sub></i> |
| ABL proto-oncogene 1, non-receptor tyrosine kinase            | ABL1(F317I)-nonphosphorylated | Hs  | Inhibitor | Inhibition | 8.1      | p <i>K<sub>d</sub></i> |
| ABL proto-oncogene 2, non-receptor tyrosine kinase            | ABL2                          | Hs  | Inhibitor | Inhibition | 8.0      | p <i>K<sub>d</sub></i> |
| colony stimulating factor 1 receptor                          | CSF1R                         | Hs  | Inhibitor | Inhibition | 8.0      | p <i>K<sub>d</sub></i> |
| v-kit Hardy-Zuckerman 4 feline sarcoma viral oncogene homolog | KIT                           | Hs  | Inhibitor | Inhibition | 7.9      | p <i>K<sub>d</sub></i> |
| v-kit Hardy-Zuckerman 4 feline sarcoma viral oncogene homolog | KIT(L576P)                    | Hs  | Inhibitor | Inhibition | 7.8      | p <i>K<sub>d</sub></i> |

Displaying the top 10 targets    [View all targets in screen »](#)

EMD Millipore KinaseProfiler™ screen/Reaction Biology Kinase HotspotSM screen

A screen profiling 158 kinase inhibitors (Calbiochem Protein Kinase Inhibitor Library I and II, catalogue numbers 539744 and 539745) for their inhibitory activity at 1μM and 10μM against 234 human recombinant kinases using the EMD Millipore KinaseProfiler™ service.  
  
A screen profiling the inhibitory activity of 178 commercially available kinase inhibitors at 0.5μM against a panel of 300 recombinant protein kinases using the Reaction Biology Corporation Kinase HotspotSM platform.  
  
<http://www.millipore.com/techpublications/tech1/pf3036>  
<http://www.reactionbiology.com/webapps/main/pages/kinase.aspx>  
  
Reference: 1,3

Key to terms and symbols

Click column headers to sort

| Target                                                        | Name in screen | Sp. | Type      | Action     | % Activity remaining at 0.5μM | % Activity remaining at 1μM | % Activity remaining at 10μM |
|---------------------------------------------------------------|----------------|-----|-----------|------------|-------------------------------|-----------------------------|------------------------------|
| platelet-derived growth factor receptor, alpha polypeptide    | PDGFRα/PDGFRa  | Hs  | Inhibitor | Inhibition | 5.9                           |                             |                              |
| colony stimulating factor 1 receptor                          | Fms/FMS        | Hs  | Inhibitor | Inhibition | 15.3                          |                             |                              |
| discoidin domain receptor tyrosine kinase 2                   | DDR2/DDR2      | Hs  | Inhibitor | Inhibition | 27.1                          |                             |                              |
| LCK proto-oncogene, Src family tyrosine kinase                | Lck/LCK        | Hs  | Inhibitor | Inhibition | 30.9                          |                             |                              |
| platelet-derived growth factor receptor, beta polypeptide     | PDGFRβ/PDGFRb  | Hs  | Inhibitor | Inhibition | 39.1                          |                             |                              |
| ABL proto-oncogene 1, non-receptor tyrosine kinase            | Abl/ABL1       | Hs  | Inhibitor | Inhibition | 44.3                          |                             |                              |
| Raf-1 proto-oncogene, serine/threonine kinase                 | c-RAF/RAF1     | Hs  | Inhibitor | Inhibition | 47.9                          |                             |                              |
| v-kit Hardy-Zuckerman 4 feline sarcoma viral oncogene homolog | cKit/c-Kit     | Hs  | Inhibitor | Inhibition | 49.6                          |                             |                              |
| ABL proto-oncogene 2, non-receptor tyrosine kinase            | Arg/ABL2(ARG)  | Hs  | Inhibitor | Inhibition | 55.9                          |                             |                              |
| LYN proto-oncogene, Src family tyrosine kinase                | Lyn/LYN        | Hs  | Inhibitor | Inhibition | 59.6                          |                             |                              |

Displaying the top 10 targets    [View all targets in screen »](#)

**Supplementary Figure 1.** Display of the results of kinase inhibitor panel screening on a ligand page (under the “Screens” tab); an in-house curated IC<sub>50</sub> value from an individual publication is also included under the “Biological Activity” tab.
